# Supplementary material
Source: Springer Nature journal article supplement (https://www.springermedizin.de/resource/supplementary/12911_2013_883_MOESM3_ESM.pdf/9526640)

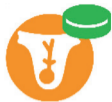

Oral drug preventing pregnancy

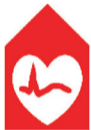

Pathologically increased heart rate

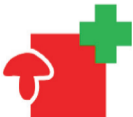

Antifungal drugs

Supplement: MOESM3 [file 9526640]
